# Supplementary material
Source: Copernicus journal article supplement (doi:10.5194/gmd-19-2881-2026)
Supplement: Supplementary file 1 [file gmd-19-2881-2026-supplement.pdf]

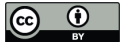

*Supplement of*

## **Towards improved Euro-Mediterranean discharge simulations in regional coupled climate models: a comparative assessment of hydrologic performance**

**Mohamed Hamitouche et al.**

*Correspondence to:* Mohamed Hamitouche ([mohamed.hamitouche@iusspavia.it](mailto:mohamed.hamitouche@iusspavia.it))

The copyright of individual parts of the supplement might differ from the article licence.

**Text S1:**

To investigate the influence of meteorological forcing errors, we assessed the performance of WRF precipitation input by calculating the mean daily percent bias relative to EOBS precipitation data for each basin (Figure S7).

5 The results reveal a mixed pattern of biases, ranging from slight underestimations, such as in the Danube (-1.2%) and Po (1.7%) basins, to substantial overestimations, as seen in the Adige (32.5%) and Kopru (27.7%) basins. Notably, the Tiber basin exhibits a significant underestimation of -27.3%. These findings highlight the variability in precipitation input accuracy across basins, which can directly affect streamflow simulation. Addressing these biases is crucial, especially in basins like the Adige and Tiber, where large deviations could propagate errors through hydrological models, underscoring the need for bias correction and refinement of precipitation datasets.

10

**Text S2:**

The calibrated parameters and their respective values for each basin are presented in Table S4. These parameters influence several key physical processes that control the hydrological response. Infiltration is regulated by the parameters *bexp*, *smcmax*, *dksat*, and *refkdt*, where higher values of these parameters generally lead to increased infiltration. Soil evaporation, on the  
15 other hand, is primarily governed by *rsurfexp* and *smcmax*, with elevated values of both promoting higher soil evaporation rates.

Aquifer recharge is strongly affected by the slope parameter. Lower values of slope reduce the transfer of water from the soil column to the groundwater reservoir, thereby decreasing aquifer recharge. Similarly, baseflow is influenced by *zmax*, *expon*, and *coeff*. High values of *zmax* tend to suppress baseflow contributions to river discharge, while higher values of *expon* and *coeff* increase it.  
20

Transpiration processes are controlled by the parameters *cwpvt*, *mp*, *vcmx25*, and *hvt*. A decrease in *cwpvt* leads to higher transpiration rates, whereas lower values of *mp*, *vcmx25*, and *hvt* result in reduced transpiration. Overland flow routing, which is affected by *retdeprtfac* and *ovroughtrfac*, decreases with higher values of these parameters. Subsurface flow is governed by *lksatfac*, where an increase in its value enhances subsurface water movement.

25 The calibration process revealed some notable overall trends across all basins. There was a consistent increase in *refkdt*, which controls runoff partitioning and results in a higher proportion of subsurface runoff compared to surface runoff. Additionally, the slope parameter consistently decreased, reducing deep drainage from the soil column to the groundwater reservoir. The *zmax* parameter showed a general increase across most basins, except for Göksu, leading to reduced baseflow contributions to river discharge.

30 While these three parameters exhibited relatively uniform behaviour across all basins, others displayed more variable trends. For instance, parameters such as *bexp*, *smcmax*, *dksat*, and *rsurfexp* showed both increases and decreases depending on the basin, reflecting local hydrological conditions.

This variability underscores the complexity of the calibration process. The interplay between parameters often determines the final hydrological outcome, as the effect of one parameter can be moderated or even compensated by another influencing the

35 same physical process. In some cases, one parameter may dominate over others, masking their effects. These findings highlight the importance of considering the combined influence of multiple parameters to ensure accurate and balanced calibration for hydrological modelling.

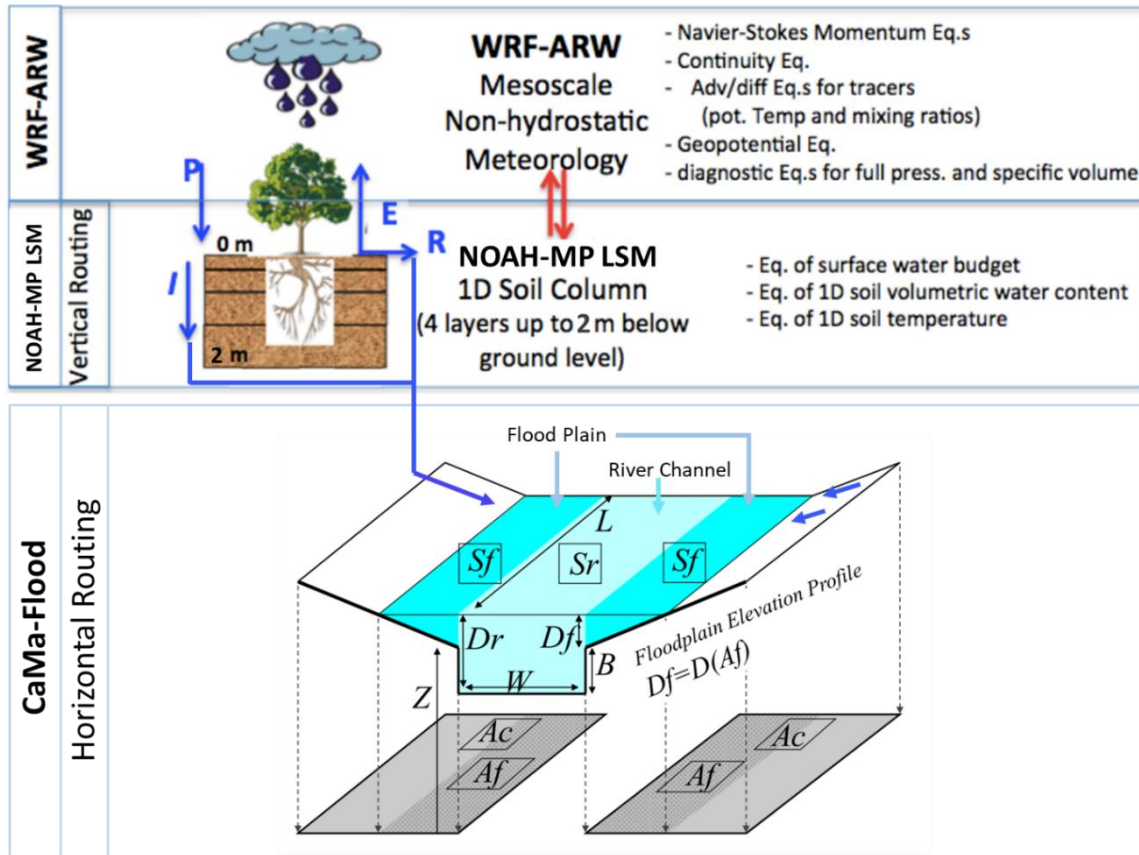

40

Figure S1: Flowchart of the offline coupling between WRF and CaMa-Flood models (adapted from Yamazaki et al. (2011) and [https://www.gewexevents.org/wp-content/uploads/Rasmussen\\_WRFHydro\\_USRHP2016.pdf](https://www.gewexevents.org/wp-content/uploads/Rasmussen_WRFHydro_USRHP2016.pdf))

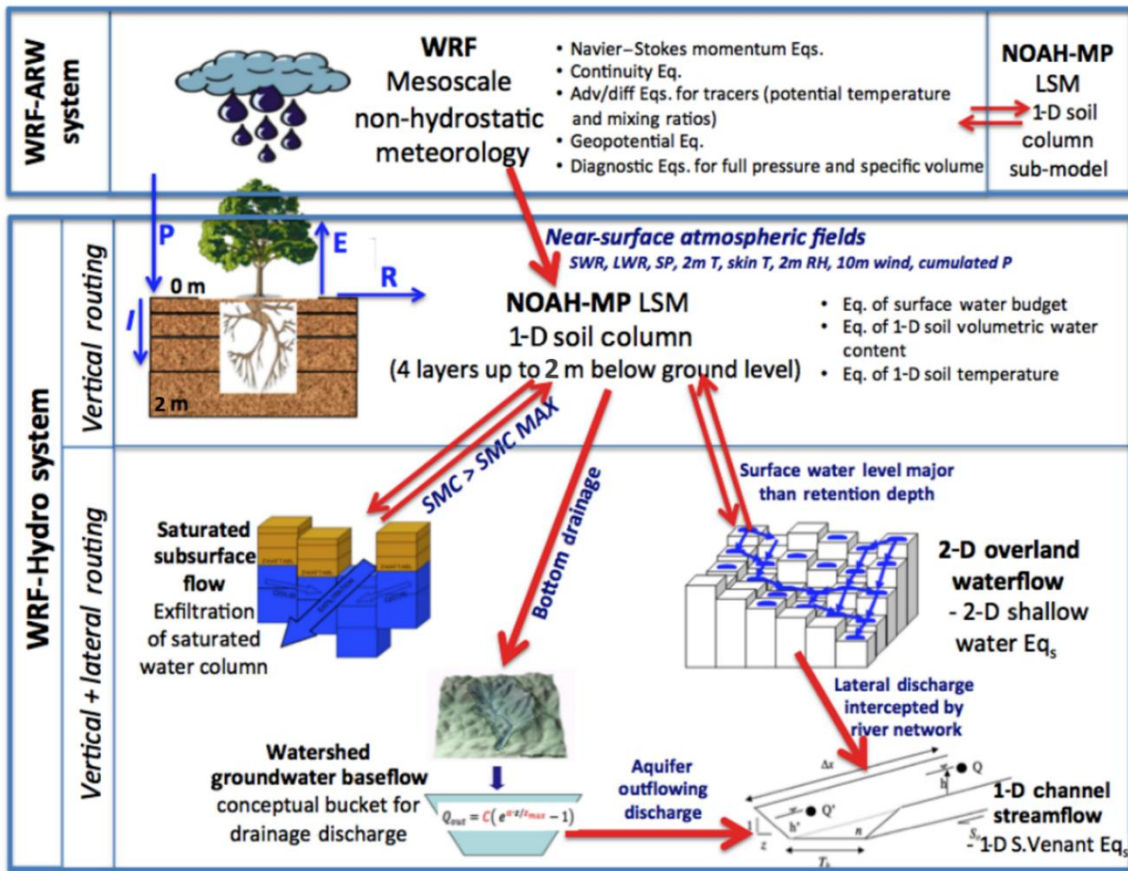

Figure S2: The schematic structure of the offline coupled WRF/WRF-Hydro model (adapted from Verri et al. (2017)).

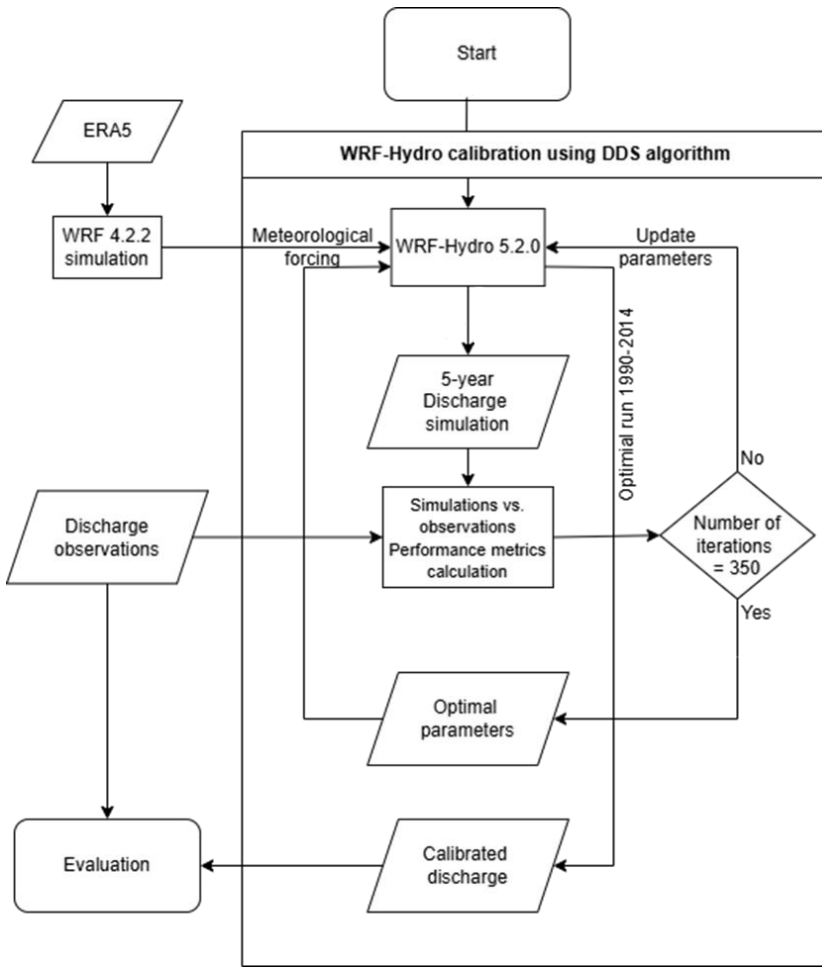

45

Figure S3: WRF-Hydro calibration flowchart.

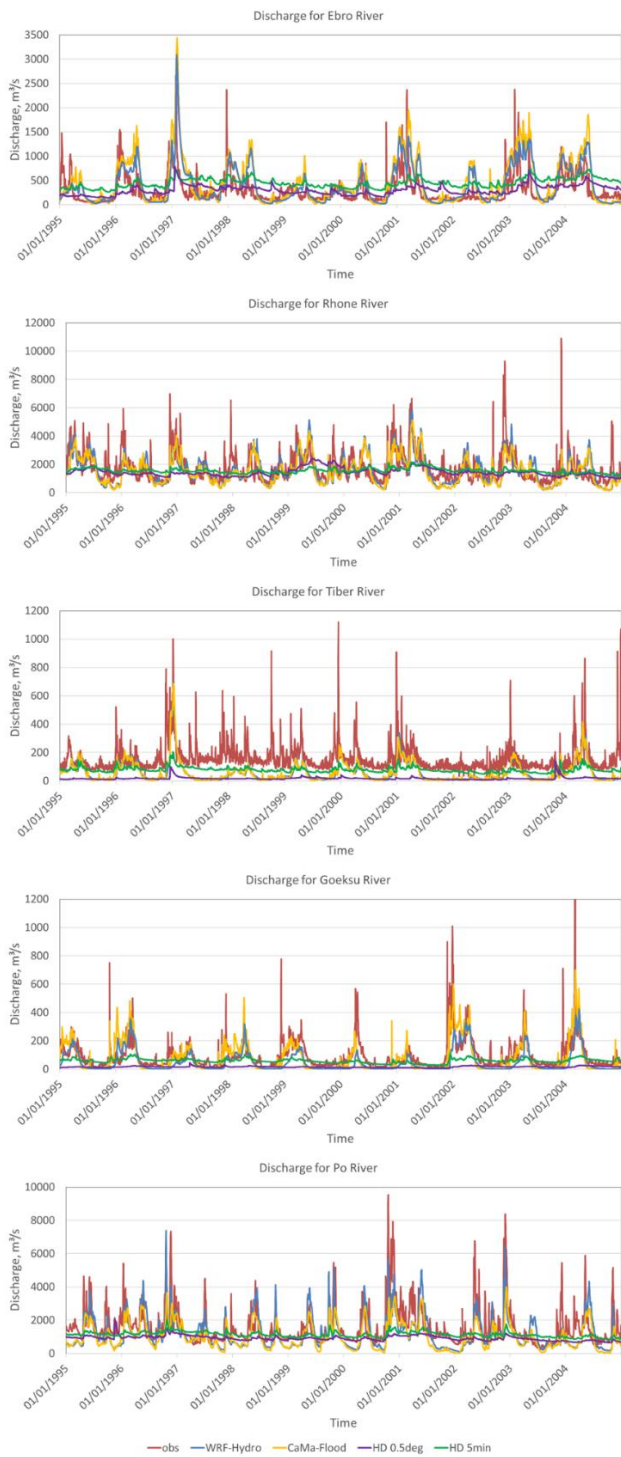

**Figure S4: Observed and simulated daily discharge for the Ebro, Rhone, Tiber, Goeksu and Po rivers for common 10 years from 1995 to 2004. Simulations include ENEA-REG-driven WRF-Hydro and CaMa-Flood, as well as the HD model at 0.5-degree and 5-minute spatial resolutions, evaluated near the corresponding gauge stations.**

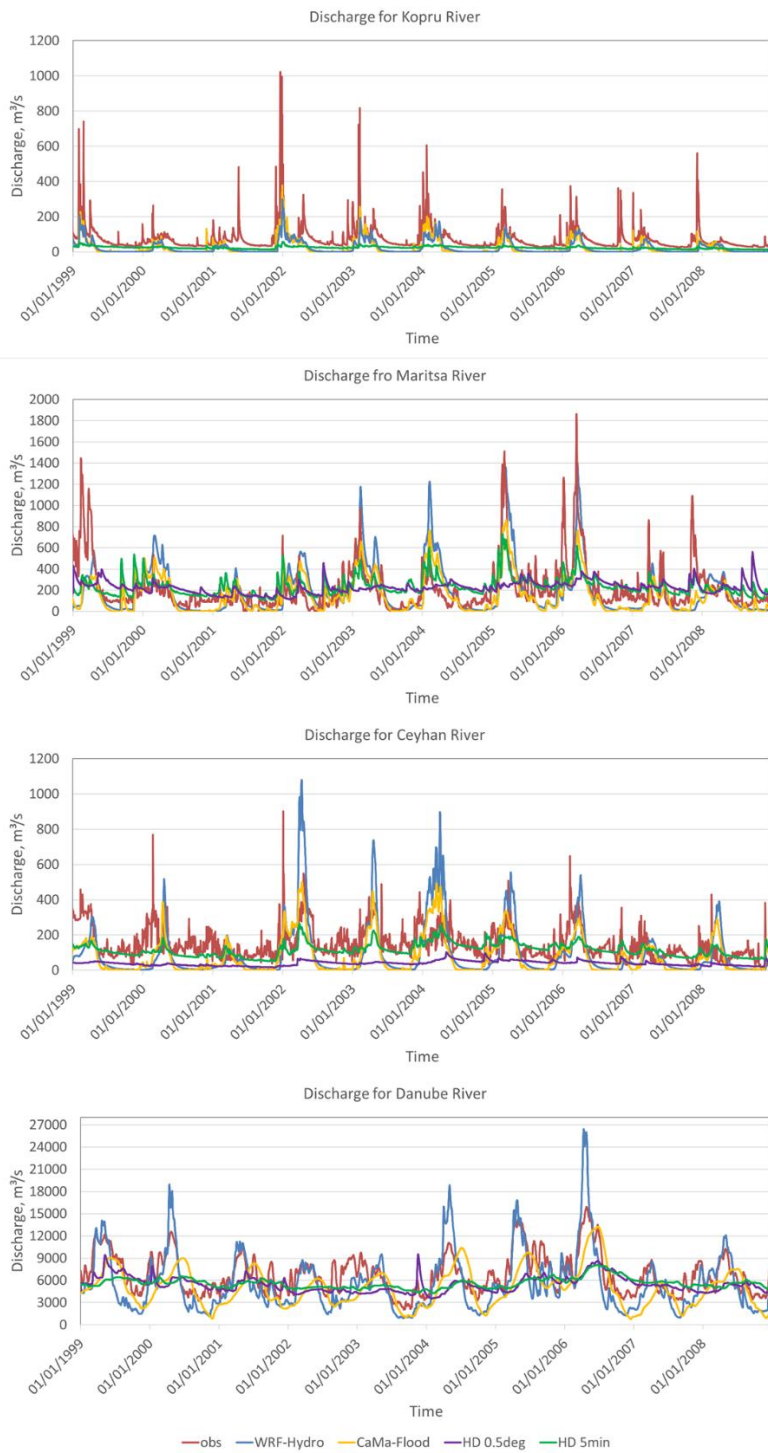

**Figure S4 (continuity):** Observed and simulated daily discharge for the Kopru, Maritsa, Ceyhan and Danube rivers for common 10 years from 1999 to 2008. Simulations include ENEA-REG-driven WRF-Hydro and CaMa-Flood, as well as the HD model at 0.5-degree and 5-minute spatial resolutions, evaluated near the corresponding gauge stations.

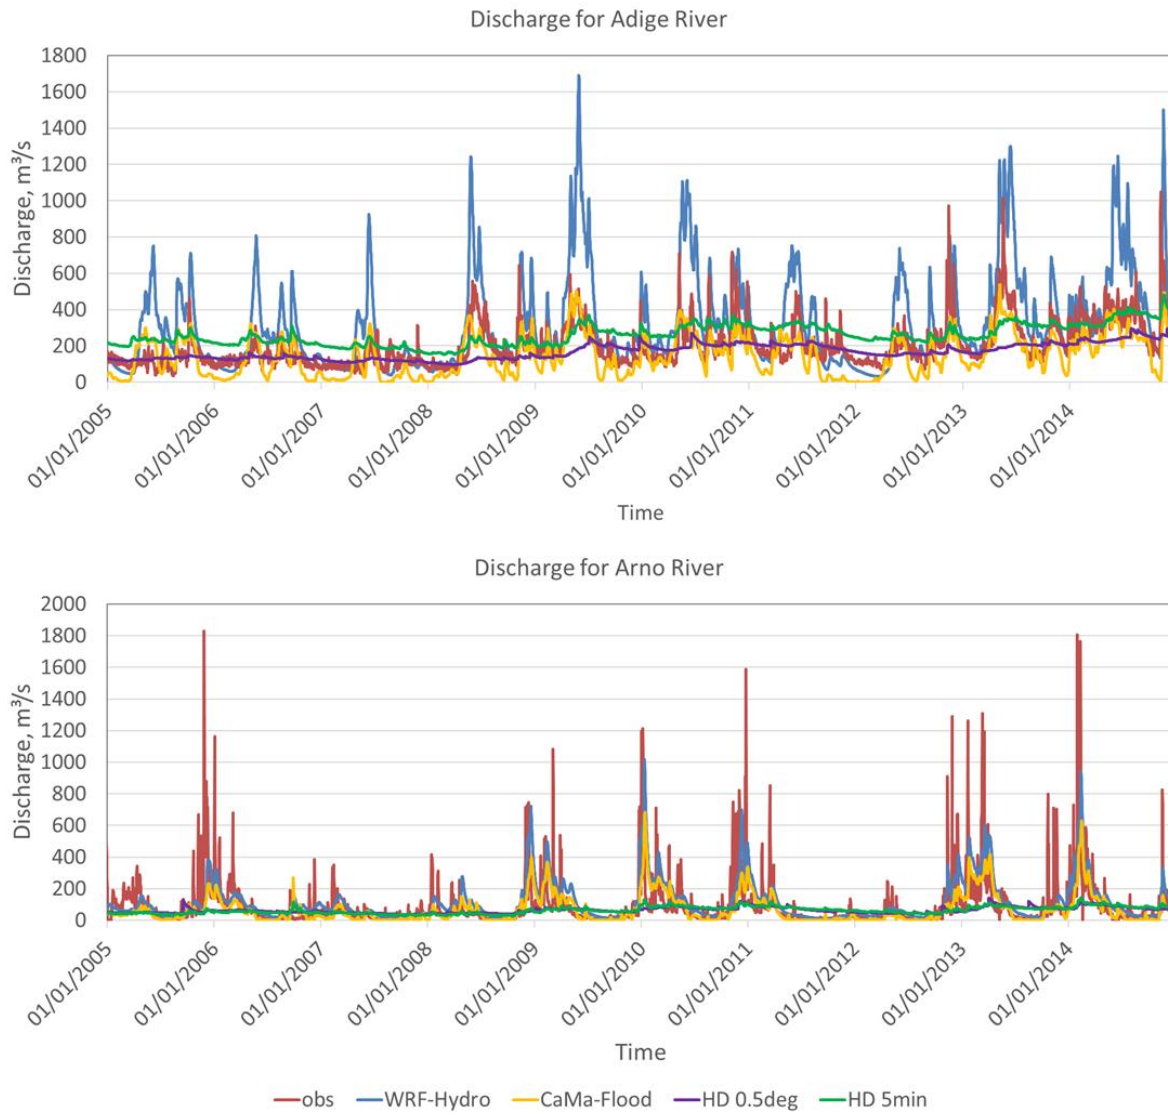

**Figure S4 (continuity):** Observed and simulated daily discharge for the Adige and Arno rivers for common 10 years from 2005 to 2014. Simulations include ENEA-REG-driven WRF-Hydro and CaMa-Flood, as well as the HD model at 0.5-degree and 5-minute spatial resolutions, evaluated near the corresponding gauge stations.

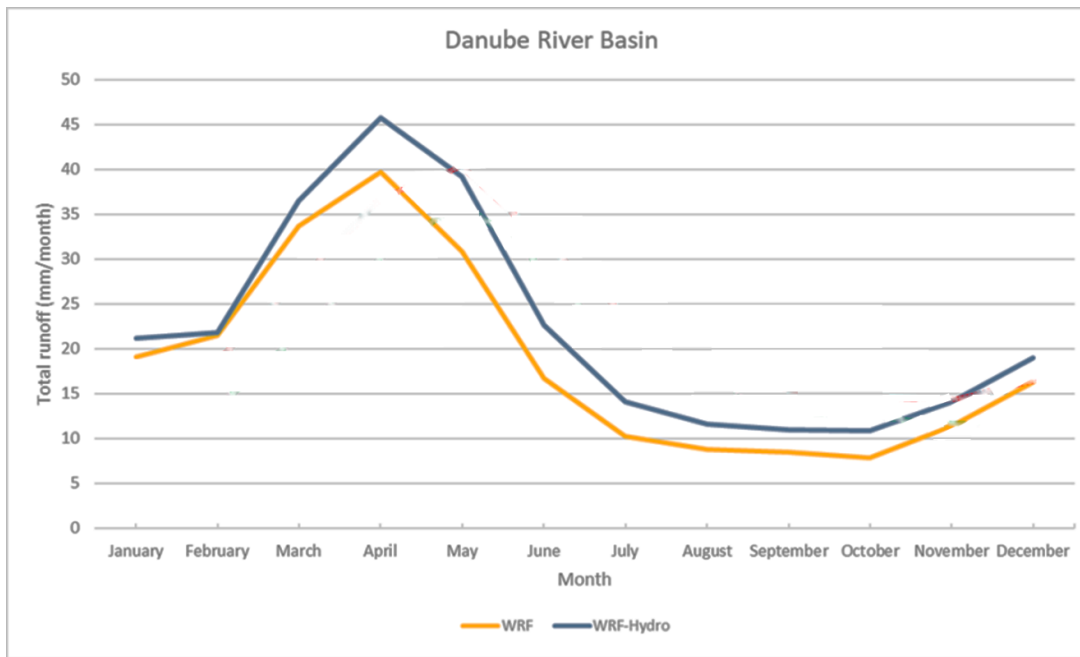

60

Figure S5: Mean seasonal cycle of runoff (mm) simulated by WRF in ENEA-REG and WRF-Hydro.

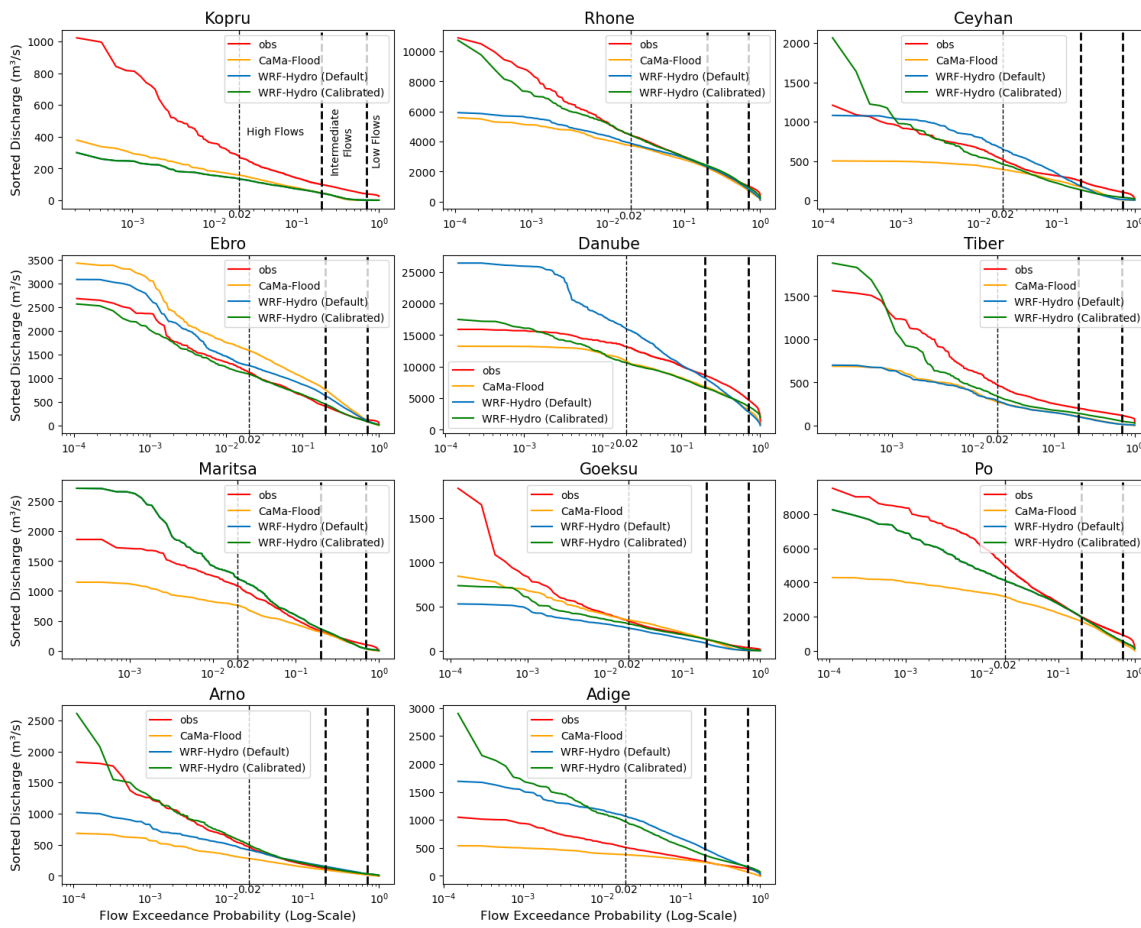

**Figure S6: Flow duration curves for each model experiment and basin, with log-scale exceedance probabilities to better visualize the high flows.**

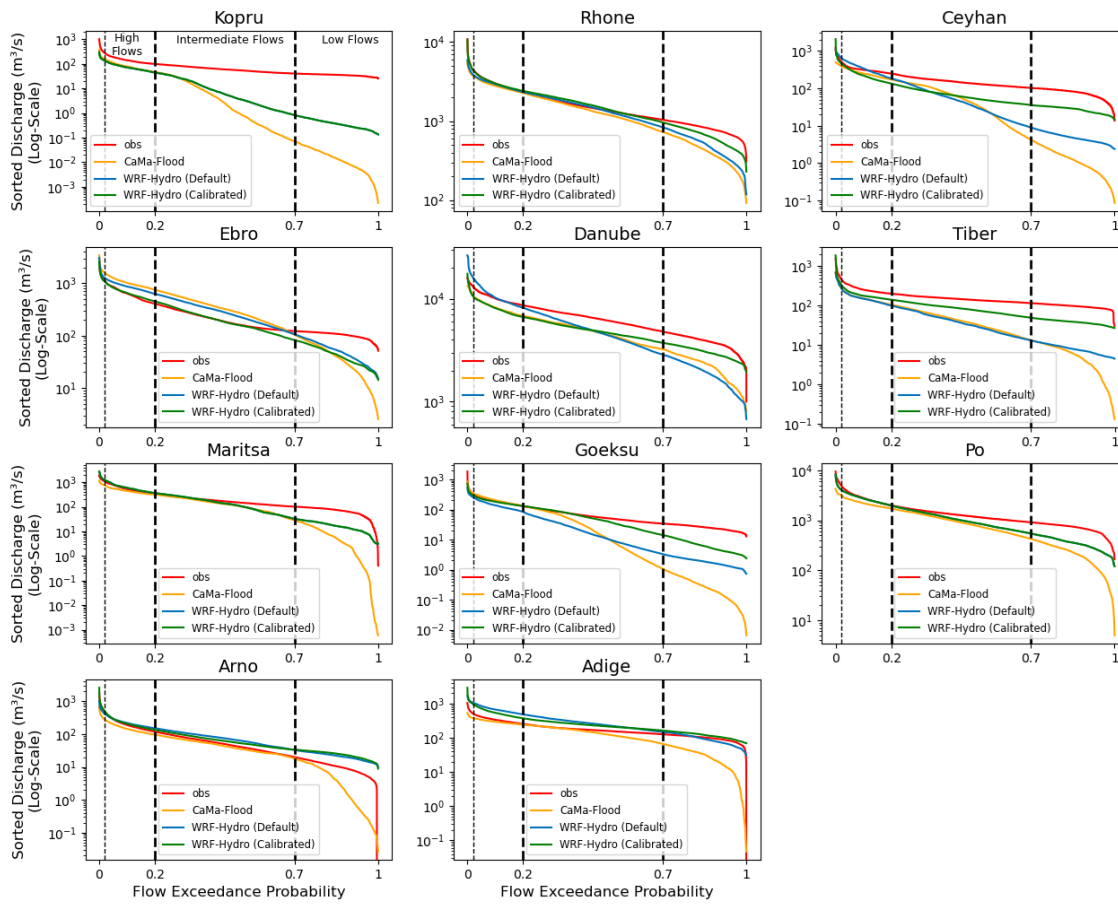

65

**Figure S7: Flow duration curves for each model experiment and basin, with log-scale discharge values to better visualize the low flows.**

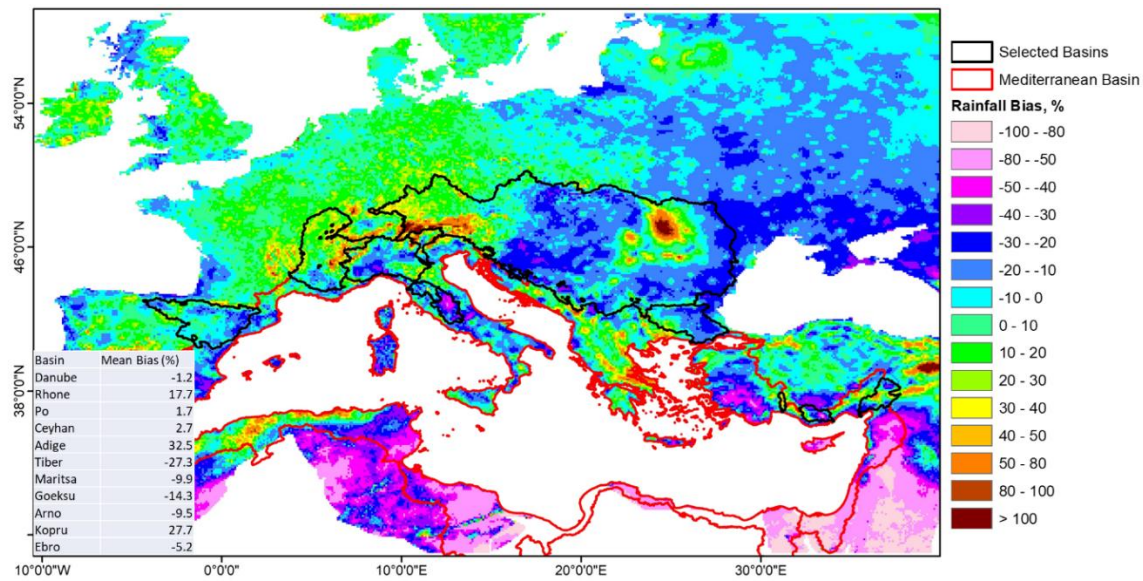

Figure S8: Distribution of the mean daily rainfall percent bias ( $100 \times (\text{WRF-EOBS})/\text{EOBS}$ )

Table S1: The main physical parametrizations used by the atmospheric WRF model.

| Atmospheric model       |                                          |
|-------------------------|------------------------------------------|
| Model                   | WRF (v4.2.2)                             |
| Domain                  | Med-CORDEX                               |
| Horizontal resolution   | 12 km                                    |
| Domain size             | 480 x 350 cells (lon x lat)              |
| Vertical resolution     | 50 hybrid levels up to 10 hPa            |
| Physical time step      | 60 s                                     |
| Forcing                 | ERA5                                     |
| Relaxation zone         | 10 points with an exponential relaxation |
| Microphysics            | Morrison (two-moment scheme)             |
| Cumulus parametrisation | BMJ                                      |
| Shortwave radiation     | RRTMG                                    |
| Longwave radiation      | RRTMG                                    |
| Land-surface model      | Noah-MP                                  |

**Table S2: Selected Noah-MP Multiphysics Parameterization Options for Physical Processes.**

| Noah-MP multiphysics parameterization         |                                                                       |
|-----------------------------------------------|-----------------------------------------------------------------------|
| Physical Process                              | Option                                                                |
| Dynamic vegetation option                     | LAI from lookup table<br>Maximum vegetation fraction from climatology |
| Canopy stomatal resistance                    | Ball-Berry                                                            |
| Soil moisture factor for stomatal resistance  | Noah                                                                  |
| Runoff                                        | Schaake                                                               |
| Surface layer drag coefficient                | M-O                                                                   |
| Frozen soil permeability                      | Niu and Yang (2006)                                                   |
| Super cooled liquid water                     | Niu and Yang (2006)                                                   |
| Radiative transfer                            | Two-stream applied to vegetated fraction                              |
| Ground snow surface albedo                    | CLASS                                                                 |
| Precipitation partitioning                    | Jordan (1991)                                                         |
| Lower boundary condition for soil temperature | Original Noah                                                         |
| Snow/soil temperature time scheme             | Semi-implicit with FSNO                                               |
| Glacier treatment                             | Ice treatment more like original Noah                                 |
| Surface resistance to evap/sublimation        | Snow/non-snow split                                                   |

80

85

90

**Table S3: WRF-Hydro calibration parameters.**

| Physical Process | Parameter    | Description                                                              | Units                  | Default value | Range      | Calibration scalar multiplier |
|------------------|--------------|--------------------------------------------------------------------------|------------------------|---------------|------------|-------------------------------|
| Soil             | bexp         | Pore size distribution index                                             | -                      | 1             | 0.4–1.9    | Yes                           |
|                  | smcmax       | Saturation soil moisture content (i.e., porosity)                        | Volumetric fraction    | 1             | 0.8–1.2    | Yes                           |
|                  | dksat        | Saturated hydraulic conductivity                                         | m/s                    | 1             | 0.2–10     | Yes                           |
|                  | rsurfexp     | Exponent in the resistance equation for soil evaporation                 | -                      | 5             | 1–6        | No                            |
| Runoff           | refkdt       | Surface runoff parameter                                                 | -                      | 1             | 0.1–4      | No                            |
|                  | slope        | Coefficient to modify the drainage out the bottom of the last soil layer | 0–1                    | 0.3           | 0–1        | No                            |
|                  | retdeprtfac  | Multiplier on retention depth limit                                      | -                      | 1             | 0.1–20,000 | No                            |
|                  | lksatfac     | Multiplier on lateral hydraulic conductivity                             | -                      | 1000          | 10–10,000  | No                            |
|                  | ovroughrtfac | Multiplier on 2D overland flow roughness factor                          | -                      | 1             | 0.01-1     | No                            |
| Groundwater      | zmax         | Maximum conceptual nonlinear reservoir depth                             | mm                     | 50            | 10–250     | No                            |
|                  | expon        | Exponent controlling rate of bucket drainage as a function of depth      | -                      | 3             | 1–8        | No                            |
|                  | Coeff        | controlling rate of bucket drainage as a function of depth               | m <sup>3</sup> /s      | 0.001         | 0.0001-0.1 | No                            |
| Vegetation       | cwpvt        | Canopy wind parameter for canopy wind profile formulation                | 1/m                    | 1             | 0.5–2      | Yes                           |
|                  | vcmx25       | Maximum carboxylation at 25°C                                            | μmol/m <sup>2</sup> /s | 1             | 0.6–1.4    | Yes                           |

|  |     |                                              |   |   |          |     |
|--|-----|----------------------------------------------|---|---|----------|-----|
|  | mp  | Slope of Ball-Berry conductance relationship | - | 1 | 0.6–1.4  | Yes |
|  | hvt | Canopy height                                | m | 1 | 0.25-1.5 | Yes |

95 **Table S4: Summary table of spin-up and calibrations periods for each river basin**

| Basin   | Spin-up period          | Calibration period (including one-year spin-up) |
|---------|-------------------------|-------------------------------------------------|
| Danube  | 01/10/1994 – 01/10/1999 | 01/10/1999 – 01/10/2005                         |
| Rhone   | 01/10/1985 – 01/10/1990 | 01/10/1990 – 01/10/1996                         |
| Po      | 01/10/2000 – 01/10/2005 | 01/10/2005 – 01/10/2011                         |
| Ceyhan  | 01/10/1995 – 01/10/2000 | 01/10/2000 – 01/10/2006                         |
| Adige   | 01/10/2000 – 01/10/2005 | 01/10/2005 – 01/10/2011                         |
| Tiber   | 01/10/1992 – 01/10/1997 | 01/10/1997 – 01/10/2003                         |
| Maritsa | 01/10/1994 – 01/10/1999 | 01/10/1999 – 01/10/2005                         |
| Goeksu  | 01/10/1995 – 01/10/2000 | 01/10/2000 – 01/10/2006                         |
| Arno    | 01/10/2000 – 01/10/2005 | 01/10/2005 – 01/10/2011                         |
| Kopru   | 01/10/1995 – 01/10/2000 | 01/10/2000 – 01/10/2006                         |
| Ebro    | 01/10/1994 – 01/10/1999 | 01/10/1999 – 01/10/2005                         |

100 **Table S5: Summary of the performances (KGE, bias, correlation, relative standard deviation, low-flow and high-flow biases) of HD model at 0.5-degree spatial resolution for each river basin, evaluated over the entire 1990-2014 period. No values are reported for the Kopru basin, as its small size relative to the coarse 0.5-degree resolution prevented extraction of a representative discharge time series.**

| Basin   | KGE   | Percent bias | Spearman's rho | Relative SD | High-flow Percent Pbias | Low-flow Percent Pbias |
|---------|-------|--------------|----------------|-------------|-------------------------|------------------------|
| Danube  | 0.15  | -21.88       | 0.35           | 0.42        | -40.62                  | -12.44                 |
| Rhone   | -0.05 | -20.92       | 0.31           | 0.28        | -61.07                  | -18.73                 |
| Po      | -0.08 | -42.61       | 0.52           | 0.18        | -77.32                  | -42.33                 |
| Ceyhan  | -0.36 | -75.77       | 0.30           | 0.11        | -88.31                  | -63.25                 |
| Adige   | 0.11  | -14.57       | 0.47           | 0.33        | -57.16                  | -1.36                  |
| Tiber   | -0.47 | -89.30       | 0.40           | 0.10        | -89.02                  | -67.41                 |
| Maritsa | -0.01 | 1.56         | 0.32           | 0.27        | -65.12                  | 6.91                   |
| Goeksu  | -0.49 | -83.36       | 0.26           | 0.05        | -94.07                  | -66.58                 |
| Arno    | -0.18 | -29.77       | 0.32           | 0.13        | -84.83                  | 8.13                   |

|       |      |      |      |      |        |      |
|-------|------|------|------|------|--------|------|
| Kopru | /    |      |      |      |        |      |
| Ebro  | 0.10 | 2.86 | 0.33 | 0.45 | -45.08 | 4.42 |

**Table S6: Summary of the performances (KGE, bias, correlation, relative standard deviation, low-flow and high-flow biases) of HD model at 5 minutes spatial resolution for each river basin, evaluated over the entire 1990-2014 period.**

| Basin   | KGE   | Percent bias | Spearman's rho | Relative SD | High-flow Percent Pbias | Low-flow Percent Pbias |
|---------|-------|--------------|----------------|-------------|-------------------------|------------------------|
| Danube  | -0.02 | -19.02       | 0.21           | 0.30        | -45.14                  | -8.82                  |
| Rhone   | -0.05 | -15.30       | 0.31           | 0.22        | -64.42                  | -6.55                  |
| Po      | -0.01 | -29.79       | 0.53           | 0.21        | -74.04                  | -21.67                 |
| Ceyhan  | 0.12  | -27.36       | 0.50           | 0.32        | -64.56                  | -7.97                  |
| Adige   | 0.18  | 38.65        | 0.55           | 0.44        | -37.52                  | 16.82                  |
| Tiber   | -0.07 | -52.18       | 0.60           | 0.18        | -78.90                  | -59.56                 |
| Maritsa | 0.31  | 6.41         | 0.64           | 0.40        | -50.96                  | 7.33                   |
| Goeksu  | -0.05 | -36.57       | 0.58           | 0.17        | -80.35                  | -6.63                  |
| Arno    | -0.13 | -28.15       | 0.34           | 0.13        | -84.43                  | 9.83                   |
| Kopru   | -0.22 | -68.48       | 0.64           | 0.10        | -89.17                  | -61.27                 |
| Ebro    | -0.05 | 49.63        | 0.42           | 0.33        | -53.01                  | 37.40                  |

105 **Table S7: Optimal values of calibrated parameters for each river basin.**

| Parameters   | Default value | Danube | Rhone  | Ceyhan | Adige | Tiber  | Goeksu | Arno   | Ebro   |
|--------------|---------------|--------|--------|--------|-------|--------|--------|--------|--------|
| bexp         | 1.000         | 0.480  | 1.881  | 0.435  | 0.424 | 1.503  | 0.959  | 1.848  | 1.892  |
| smcmax       | 1.000         | 1.198  | 1.198  | 1.155  | 1.193 | 0.816  | 0.835  | 1.195  | 1.199  |
| dksat        | 1.000         | 1.029  | 0.347  | 0.751  | 0.368 | 0.342  | 1.087  | 0.579  | 0.575  |
| rsurfexp     | 5.000         | 5.213  | 4.990  | 4.869  | 5.972 | 3.471  | 2.369  | 5.732  | 5.899  |
| refkdt       | 1.000         | 3.722  | 1.461  | 3.057  | 3.987 | 1.486  | 3.468  | 3.796  | 1.447  |
| slope        | 0.300         | 0.013  | 0.104  | 0.016  | 0.026 | 0.890  | 0.103  | 0.010  | 0.021  |
| retdeprtfac  | 1.000         | 5.095  | 8.763  | 9.218  | 3.850 | 0.142  | 9.893  | 0.731  | 4.848  |
| lksatfac     | 1000.0        | 959.3  | 3700.3 | 3681.9 | 836.0 | 6606.1 | 6093.3 | 4633.8 | 2194.8 |
| ovroughtrfac | 1.000         | 0.919  | 0.996  | 0.964  | 0.993 | 0.027  | 0.768  | 0.922  | 0.971  |
| zmax         | 50.00         | 249.2  | 247.8  | 249.7  | 231.3 | 249.2  | 10.76  | 249.0  | 63.35  |

|        |       |       |       |       |       |       |       |       |                     |
|--------|-------|-------|-------|-------|-------|-------|-------|-------|---------------------|
| expon  | 3.000 | 3.075 | 1.930 | 3.339 | 4.453 | 3.308 | 1.082 | 1.003 | 1.401               |
| Coeff  | 0.001 | 0.046 | 0.020 | 0.096 | 0.099 | 0.083 | 0.010 | 0.002 | 0.006               |
| cwpvt  | 1.000 | 0.548 | 0.533 | 0.596 | 0.513 | 0.542 | 1.952 | 0.760 | 0.530               |
| vcmx25 | 1.000 | 1.004 | 1.006 | 0.648 | 1.368 | 0.641 | 1.400 | 0.816 | 1.147               |
| mp     | 1.000 | 1.095 | 1.023 | 0.601 | 1.376 | 0.959 | 1.389 | 1.281 | 1.311 <sup>10</sup> |
| hvt    | 1.000 | 0.253 | 0.302 | 1.342 | 0.254 | 0.451 | 0.364 | 0.970 | 0.254               |

## References

115

Jordan, R. E.: A one-dimensional temperature model for a snow cover: Technical documentation for SNTHERM, 89, <https://erdc-library.erdcdren.mil/jspui/bitstream/11681/11677/1/SR-91-16.pdf> (last access: 13 June 2025), 1991.

120

Niu, G.-Y. and Yang, Z.-L.: Effects of Frozen Soil on Snowmelt Runoff and Soil Water Storage at a Continental Scale, *J. Hydrometeorol.*, 7, 937–952, <https://doi.org/10.1175/JHM538.1>, 2006.

125

Verri, G., Pinardi, N., Gochis, D., Tribbia, J., Navarra, A., Coppini, G., and Vukicevic, T.: A meteo-hydrological modelling system for the reconstruction of river runoff: the case of the Ofanto river catchment, *Natural Hazards and Earth System Sciences*, 17, 1741–1761, <https://doi.org/10.5194/nhess-17-1741-2017>, 2017.

130

Yamazaki, D., Kanae, S., Kim, H., and Oki, T.: A physically based description of floodplain inundation dynamics in a global river routing model, *Water Resour. Res.*, 47, <https://doi.org/10.1029/2010WR009726>, 2011.

135
